# Supplementary material for: Physiological and biochemical effects of 24-Epibrassinolide on drought stress adaptation in maize (Zea mays L.)
Source: PeerJ. 2024 Mar 27;12:e17190. doi: 10.7717/peerj.17190 (PMC10981409; doi:10.7717/peerj.17190)
Supplement: Supplemental Information 3 [file peerj-12-17190-s003.xls]

## Sheet: Sheet1
		Table 1: Effect of pre-anthesis foliar application of 24-epibrassinolide on morphological parametrs in two maize hybrids under water deficit conditions
		Vivek Hybrid 9									Bio 9637
	DAT (Days after treatment)		T0			T1			T2			T0			T1			T2
		R1	R2	R3	R1	R2	R3	R1	R2	R3	R1	R2	R3	R1	R2	R3	R1	R2	R3
Leaf senescence (1-9 scale)	7	1	1	1	2	2	3	2	2	3	1	1	1	3	3	4	3	2	3
	14	1	2	1	3	3	2	3	3	2	1	1	2	5	4	5	4	3	4
	21	2	1	2	4	4	5	4	4	3	2	3	2	7	6	7	5	5	4
	28	2	2	3	6	5	5	4	4	5	2	3	4	9	7	8	6	5	6
Photosynthetic rate (µmol m-2s-1)	7	40.3	41.9	42.7	36.4	37.2	36.9	38.7	39.6	39.2	38.7	38.2	37.9	29.6	30.6	28.2	33.9	34.1	32.9
	14	38.5	37.4	38.2	34.6	35.1	35.3	37.4	38.5	38.1	37.5	37.1	37.5	25.2	24.9	25.3	31.5	30.2	31.4
	21	35.2	36.7	35.9	33.4	33.2	32.4	35.9	35.4	35.7	35.2	34.9	36	21.6	21.9	20.8	28.9	27.5	28.9
	28	33.7	34.8	33.9	27.4	29.8	28.3	31.6	32.1	32.4	35.9	34.1	34.9	18.7	19	18.2	27.4	26.7	27.9
NDVI	7	0.832	0.813	0.831	0.745	0.751	0.742	0.772	0.779	0.783	0.801	0.791	0.783	0.713	0.702	0.707	0.771	0.775	0.769
	14	0.833	0.829	0.811	0.721	0.719	0.725	0.751	0.749	0.757	0.813	0.801	0.811	0.652	0.649	0.654	0.763	0.767	0.769
	21	0.81	0.809	0.801	0.711	0.703	0.714	0.734	0.731	0.728	0.771	0.769	0.771	0.632	0.637	0.642	0.754	0.751	0.756
	28	0.802	0.803	0.796	0.692	0.691	0.699	0.725	0.723	0.733	0.759	0.762	0.764	0.611	0.609	0.614	0.743	0.739	0.746
Total soluble proteins	7	8.75	11.68	8.46	7.9	7.7	9.7	8.6	9.8	9.6	16.8	16.5	16.1	9.4	7.7	9.9	14.67	13.69	16
	14	14.34	16.9	16.45	14.23	16.4	13.43	16.5	16.6	12.25	17.5	17.5	15.56	11	8.3	10.4	15.36	14.56	16.3
	21	18.4	18.5	15.23	17.5	15.68	17.5	17.8	19.86	17.9	18.3	15.47	18.7	11.4	13.2	9.5	16.3	16.4	17.3
	28	21.2	25.67	20.8	18.7	18.5	18.5	19.2	19.5	19.8	18.48	17.47	19.3	11.6	12	12.4	18	17.6	17.5
Membrane stability index	7	81.46	79.34	85.45	64	76.28	76	81.3	81.38	81.36	83.45	82.5	81.45	66.38	66.35	65.36	77.78	77.62	78.54
	14	80.29	88.12	82.47	64.47	68.56	67.46	76.38	75	76	79.36	80.365	77.34	58.37	56.37	58.38	61.34	63.47	66.47
	21	77.46	77.23	72.2	63.34	63	60.3	70	73.45	74	78	76	77.35	52.47	50.5	51	65.56	65.56	66.64
	28	74	79.35	63.87	58.9	55.23	56	64.28	64	63.36	69.36	66	69.36	35.45	38.83	38.48	58	58	56
SOD	7	21	23	25	31	32	36	46	48	51	14	12	12	17	19	16	24	26	24
	14	29	34	33	44	41	47	39	41	44	21	21	20	23	19	21	33	34	37
	21	28	27	27	31	34	32	36	38	37	19	21	21	23	20	21	25	25	25
	28	33	34	31	32	31	32	36	34	38	25	23	23	26	24	23	27	24	29
CAT	7	5.6	5.9	6.2	9.42	9.99	9.52	15.32	16	17.89	2.34	2.22	2.21	5.6	4.2	4.24	8.31	9.23	8.45
	14	8.8	8.6	9.2	16.3	16.46	17.26	19.42	18.56	20.25	7.34	8.11	7.56	9.23	9.56	9.32	14.5	16.67	15.55
	21	12.57	9.46	11.23	24.45	25.45	23.68	29.94	33.33	27.28	9.45	11.12	10.25	14.42	12.87	15.55	23.67	24.46	21.23
	28	22.34	22.34	24.23	33.43	35.99	33.33	37.72	39.92	39.99	16.45	14.32	14.23	17.81	17.43	23.34	24.43	28.43	29.98
Ascorbate peroxidase	7	0.32	0.21	0.21	0.3	0.26	0.32	0.34	0.36	0.32	0.13	0.15	0.12	0.14	0.17	0.19	0.29	0.25	0.22
	14	0.31	0.27	0.28	0.46	0.48	0.42	0.49	0.5	0.49	0.19	0.21	0.23	0.26	0.29	0.26	0.43	0.38	0.39
	21	0.43	0.39	0.41	0.58	0.53	0.56	0.58	0.59	0.55	0.32	0.29	0.35	0.35	0.38	0.37	0.59	0.54	0.58
	28	0.52	0.55	0.52	0.82	0.88	0.84	0.85	0.83	0.87	0.46	0.42	0.45	0.59	0.55	0.55	0.75	0.76	0.77
Plant girth (cm)	7	6.3	6.3	6.2	6.3	6.4	6.5	6.2	6.2	6.3	7.3	7.6	7.2	6.5	6.3	6.4	6.4	6.6	6
	14	6.4	6.2	6.5	6.2	6.1	6.3	6.6	6.3	6.3	7.4	7.6	7.3	6.5	6.5	6.4	6.4	6.7	6.1
	21	6.6	6.5	6.2	6.1	6	6.2	6.3	6.1	6.4	7.2	7.5	7.4	6.6	6.7	6.6	6.5	6.8	6.2
	28	6.5	6.5	6.1	6	6.2	6	6.3	6.1	6.3	7.1	7.3	7	6.5	5.8	6.3	6.4	6.7	6.2
Leaf area index	7	3.73	3.71	3.75	3.69	3.71	3.66	3.71	3.76	3.73	3.79	3.81	3.77	3.67	3.7	3.66	3.71	3.73	3.75
	14	3.77	3.72	3.81	3.62	3.61	3.6	3.66	3.62	3.59	3.89	3.87	3.85	3.54	3.55	3.57	3.63	3.65	3.63
	21	3.81	3.83	3.82	3.51	3.54	3.49	3.59	3.62	3.64	3.92	3.91	3.97	3.41	3.39	3.45	3.54	3.57	3.52
	28	3.83	3.87	3.85	3.36	3.39	3.33	3.46	3.49	3.41	4.06	4.02	4.07	3.33	3.23	3.29	3.49	3.51	3.47
Root fress biomass (g)	7	37.2	37.9	38.2	34.7	35.2	34.9	36.2	36.9	35.8	47.1	46.9	46.1	43.2	44	42.9	44.3	43.9	44.7
	14	39.4	37.5	38.1	32.4	32.7	33.1	33.6	33.2	33.5	46.4	46.2	45.3	36.7	37.1	36.5	37.2	37.9	36.8
	21	38.1	35.9	37	30.3	31.2	30.9	31.7	31.9	32.1	43.3	44.1	43.2	31.3	31.1	31.9	32.7	32.9	32.1
	28	34.5	35.3	34.9	27.9	28.3	27.9	30.5	30.4	30.1	40.5	41	40.9	23.9	24.5	25.6	29.5	29.9	30.2
RWC (%)	7	87	88	89	75	77	74	79	83	81	89	86	88	80	78	76	84	86	89
	14	85	85	86	69	70	72	76	73	72	85	88	81	77	77	73	82	88	85
	21	78	75	73	66	63	64	68	70	70	78	76	75	65	66	67	74	78	70
	28	77	75	77	62	61	69	67	67	70	72	70	73	59	61	58	65	69	70
Leaf water potential (-MPa)	7	2.01	2.07	1.99	2.27	2.29	2.32	2.17	2.2	2.13	2.05	2.01	2.99	2.63	2.61	2.67	2.21	2.18	2.24
	14	2.02	2.05	2.02	2.3	2.33	2.36	2.24	2.27	2.21	2.07	2.11	2.04	2.74	2.77	2.71	2.35	2.3	2.39
	21	2.13	2.15	2.11	2.41	2.39	2.37	2.28	2.31	2.24	2.1	2.06	2.14	2.85	2.89	2.8	2.49	2.55	2.43
	28	2.15	2.17	2.13	2.45	2.48	2.52	2.31	2.35	2.26	2.17	2.21	2.13	2.93	2.96	2.91	2.57	2.6	2.53
Glycine betaine content	7	62	65	51	111	128	157	180	190	199	32	45	63	51	52	62	76	110	140
	14	74	72	88	139	137	200	200	159	223	67	43	49	104	82	45	182	121	147
	21	83	83	96	140	177	190	190	174	149	64	72	53	88	78	115	152	132	148
	28	84	81	106	241	253	210	271	248	255	74	52	75	127	129	121	199	224	165
Proline content	7	5.32	4.65	3.24	6.43	6.83	5.7	6.87	7.35	7.26	3.21	4.27	4.35	6.21	4.58	4.16	8.37	6.46	6.34
	14	5.57	5.12	6.21	11.32	14.73	11.48	11.83	11.87	12.48	4.6	3.45	4.76	5.21	5.58	5.11	7.45	8.26	7.46
	21	6.23	6.87	7.21	14.57	14.52	16.45	14.57	15.02	14.37	5.78	5.54	6.21	7.92	8.41	7.45	12.32	9.58	9.47
	28	6.43	6.12	8.78	20.5	20.47	21.46	21.47	22.03	22.47	7.78	6.42	6.91	7.89	7.97	8.22	14.11	11.21	9.46
ASI (days)		1	1	1	4	3	3	2	3	2	1	2	1	6	9	7	3	4	3
		80	83	81	67	70	72	77	75	76	96	91	97	79	78	83	87	90	85
Cob weight (g)		109	102	107	78	83	80	83	87	82	163	165	177	129	133	125	142	133	158
Cob girth (cm)		10.2	9.7	9.9	8.6	8.5	8.2	8.9	8.4	8.9	10	10.5	10.2	8.5	8.2	8	9.3	9.2	9.5
100 grain weight (g)		27	28	28	22	20	23	24	25	23	32	33	30	21	18	19	25	27	26
Harvest index		0.49	0.47	0.46	0.34	0.37	0.35	0.39	0.4	0.37	0.47	0.49	0.43	0.27	0.29	0.24	0.34	0.33	0.37
T0-Control
T1-Drought
T1-Drought+EBR
R1-Replication 1
R2-Replication 2
R3-Replication 3

## Sheet: Morphological
	Table 1: Effect of pre-anthesis foliar application of 24-epibrassinolide on morphological parametrs in two maize hybrids under water deficit conditions
	Plant girth (cm)
	Vivek Hybrid 9												Bio 9637
DAT		T0				T1				T2				T0				T1				T2
	R1	R2	R3	Mean	R1	R2	R3	Mean	R1	R2	R3	Mean	R1	R2	R3	Mean	R1	R2	R3	Mean	R1	R2	R3	Mean
7	6.3	6.3	6.2	6.26667	6.3	6.4	6.5	6.4	6.2	6.2	6.3	6.23333	7.3	7.6	7.2	7.36667	6.5	6.3	6.4	6.4	6.4	6.6	6	6.33333
14	6.4	6.2	6.5	6.36667	6.2	6.1	6.3	6.2	6.6	6.3	6.3	6.4	7.4	7.6	7.3	7.43333	6.5	6.5	6.4	6.46667	6.4	6.7	6.1	6.4
21	6.6	6.5	6.2	6.43333	6.1	6	6.2	6.1	6.3	6.1	6.4	6.26667	7.2	7.5	7.4	7.36667	6.6	6.7	6.6	6.63333	6.5	6.8	6.2	6.5
28	6.5	6.5	6.1	6.36667	6	6.2	6	6.06667	6.3	6.1	6.3	6.23333	7.1	7.3	7	7.13333	6.5	5.8	6.3	6.2	6.4	6.7	6.2	6.43333
Mean
	Leaf area index
	Vivek Hybrid 9												Bio 9637
DAT		T0				T1				T2				T0				T1				T2
	R1	R2	R3	Mean	R1	R2	R3	Mean	R1	R2	R3	Mean	R1	R2	R3	Mean	R1	R2	R3	Mean	R1	R2	R3	Mean
7	3.73	3.71	3.75	3.73	3.69	3.71	3.66	3.68667	3.71	3.76	3.73	3.73333	3.79	3.81	3.77	3.79	3.67	3.7	3.66	3.67667	3.71	3.73	3.75	3.73
14	3.77	3.72	3.81	3.76667	3.62	3.61	3.6	3.61	3.66	3.62	3.59	3.62333	3.89	3.87	3.85	3.87	3.54	3.55	3.57	3.55333	3.63	3.65	3.63	3.63667
21	3.81	3.83	3.82	3.82	3.51	3.54	3.49	3.51333	3.59	3.62	3.64	3.61667	3.92	3.91	3.97	3.93333	3.41	3.39	3.45	3.41667	3.54	3.57	3.52	3.54333
28	3.83	3.87	3.85	3.85	3.36	3.39	3.33	3.36	3.46	3.49	3.41	3.45333	4.06	4.02	4.07	4.05	3.33	3.23	3.29	3.28333	3.49	3.51	3.47	3.49
Mean
	Root fress biomass (g)
	Vivek Hybrid 9												Bio 9637
DAT		T0				T1				T2				T0				T1				T2
	R1	R2	R3	Mean	R1	R2	R3	Mean	R1	R2	R3	Mean	R1	R2	R3	Mean	R1	R2	R3	Mean	R1	R2	R3	Mean
7	37.2	37.9	38.2	37.7667	34.7	35.2	34.9	34.9333	36.2	36.9	35.8	36.3	47.1	46.9	46.1	46.7	43.2	44	42.9	43.3667	44.3	43.9	44.7	44.3
14	39.4	37.5	38.1	38.3333	32.4	32.7	33.1	32.7333	33.6	33.2	33.5	33.4333	46.4	46.2	45.3	45.9667	36.7	37.1	36.5	36.7667	37.2	37.9	36.8	37.3
21	38.1	35.9	37	37	30.3	31.2	30.9	30.8	31.7	31.9	32.1	31.9	43.3	44.1	43.2	43.5333	31.3	31.1	31.9	31.4333	32.7	32.9	32.1	32.5667
28	34.5	35.3	34.9	34.9	27.9	28.3	27.9	28.0333	30.5	30.4	30.1	30.3333	40.5	41	40.9	40.8	23.9	24.5	25.6	24.6667	29.5	29.9	30.2	29.8667
Mean

## Sheet: Physiological
	Table2: Effect of pre-anthesis foliar application of 24-epibrassinolide on physiological parameters in two maize hybrids under water deficit conditions
	RWC (%)
	Vivek Hybrid 9												Bio 9637
DAT		T0				T1				T2				T0				T1				T2
	R1	R2	R3	Mean	R1	R2	R3	Mean	R1	R2	R3	Mean	R1	R2	R3	Mean	R1	R2	R3	Mean	R1	R2	R3	Mean
7	87	88	89	88	75	77	74	75.3333	79	83	81	81	89	86	88	87.6667	80	78	76	78	84	86	89	86.3333
14	85	85	86	85.3333	69	70	72	70.3333	76	73	72	73.6667	85	88	81	84.6667	77	77	73	75.6667	82	88	85	85
21	78	75	73	75.3333	66	63	64	64.3333	68	70	70	69.3333	78	76	75	76.3333	65	66	67	66	74	78	70	74
28	77	75	77	76.3333	62	61	69	64	67	67	70	68	72	70	73	71.6667	59	61	58	59.3333	65	69	70	68
Mean
	Leaf water potential (-MPa)
	Vivek Hybrid 9												Bio 9637
DAT		T0				T1				T2				T0				T1				T2
	R1	R2	R3	MEAN	R1	R2	R3	MEAN	R1	R2	R3	MEAN	R1	R2	R3	MEAN	R1	R2	R3	MEAN	R1	R2	R3	MEAN
7	2.01	2.07	1.99	2.02333	2.27	2.29	2.32	2.29333	2.17	2.2	2.13	2.16667	2.05	2.01	2.99	2.35	2.63	2.61	2.67	2.63667	2.21	2.18	2.24	2.21
14	2.02	2.05	2.02	2.03	2.3	2.33	2.36	2.33	2.24	2.27	2.21	2.24	2.07	2.11	2.04	2.07333	2.74	2.77	2.71	2.74	2.35	2.3	2.39	2.34667
21	2.13	2.15	2.11	2.13	2.41	2.39	2.37	2.39	2.28	2.31	2.24	2.27667	2.1	2.06	2.14	2.1	2.85	2.89	2.8	2.84667	2.49	2.55	2.43	2.49
28	2.15	2.17	2.13	2.15	2.45	2.48	2.52	2.48333	2.31	2.35	2.26	2.30667	2.17	2.21	2.13	2.17	2.93	2.96	2.91	2.93333	2.57	2.6	2.53	2.56667
Mean
	Leaf senescence (1-9 scale)
	Vivek Hybrid 9												Bio 9637
DAT		T0				T1				T2				T0				T1				T2
	R1	R2	R3	MEAN	R1	R2	R3	MEAN	R1	R2	R3	MEAN	R1	R2	R3	MEAN	R1	R2	R3	MEAN	R1	R2	R3	MEAN
7	1	1	1	1	2	2	3	2.33333	2	2	3	2.33333	1	1	1	1	3	3	4	3.33333	3	2	3	2.66667
14	1	2	1	1.33333	3	3	2	2.66667	3	3	2	2.66667	1	1	2	1.33333	5	4	5	4.66667	4	3	4	3.66667
21	2	1	2	1.66667	4	4	5	4.33333	4	4	3	3.66667	2	3	2	2.33333	7	6	7	6.66667	5	5	4	4.66667
28	2	2	3	2.33333	6	5	5	5.33333	4	4	5	4.33333	2	3	4	3	9	7	8	8	6	5	6	5.66667
Mean
	Photosynthetic rate (µmol m-2s-1)
	Vivek Hybrid 9												Bio 9637
DAT		T0				T1				T2				T0				T1				T2
	R1	R2	R3	MEAN	R1	R2	R3	MEAN	R1	R2	R3	MEAN	R1	R2	R3	MEAN	R1	R2	R3	MEAN	R1	R2	R3	MEAN
7	40.3	41.9	42.7	41.6333	36.4	37.2	36.9	36.8333	38.7	39.6	39.2	39.1667	38.7	38.2	37.9	38.2667	29.6	30.6	28.2	29.4667	33.9	34.1	32.9	33.6333
14	38.5	37.4	38.2	38.0333	34.6	35.1	35.3	35	37.4	38.5	38.1	38	37.5	37.1	37.5	37.3667	25.2	24.9	25.3	25.1333	31.5	30.2	31.4	31.0333
21	35.2	36.7	35.9	35.9333	33.4	33.2	32.4	33	35.9	35.4	35.7	35.6667	35.2	34.9	36	35.3667	21.6	21.9	20.8	21.4333	28.9	27.5	28.9	28.4333
28	33.7	34.8	33.9	34.1333	27.4	29.8	28.3	28.5	31.6	32.1	32.4	32.0333	35.9	34.1	34.9	34.9667	18.7	19	18.2	18.6333	27.4	26.7	27.9	27.3333
Mean
	NDVI
	Vivek Hybrid 9												Bio 9637
DAT		T0				T1				T2				T0				T1				T2
	R1	R2	R3	MEAN	R1	R2	R3	MEAN	R1	R2	R3	MEAN	R1	R2	R3	MEAN	R1	R2	R3	MEAN	R1	R2	R3	MEAN
7	0.832	0.813	0.831	0.825333	0.745	0.751	0.742	0.746	0.772	0.779	0.783	0.778	0.801	0.791	0.783	0.791667	0.713	0.702	0.707	0.707333	0.771	0.775	0.769	0.771667
14	0.833	0.829	0.811	0.824333	0.721	0.719	0.725	0.721667	0.751	0.749	0.757	0.752333	0.813	0.801	0.811	0.808333	0.652	0.649	0.654	0.651667	0.763	0.767	0.769	0.766333
21	0.81	0.809	0.801	0.806667	0.711	0.703	0.714	0.709333	0.734	0.731	0.728	0.731	0.771	0.769	0.771	0.770333	0.632	0.637	0.642	0.637	0.754	0.751	0.756	0.753667
28	0.802	0.803	0.796	0.800333	0.692	0.691	0.699	0.694	0.725	0.723	0.733	0.727	0.759	0.762	0.764	0.761667	0.611	0.609	0.614	0.611333	0.743	0.739	0.746	0.742667
Mean

## Sheet: Biochemical
	Table3: Effect of pre-anthesis foliar application of 24-epibrassinolide on biocmemical parameters in two maize hybrids under water deficit conditions
	Total soluble proteins			(mg/g.fwt)
	Vivek Hybrid 9												Bio 9637
DAT		T0				T1				T2				T0				T1				T2
	R1	R2	R3	Mean	R1	R2	R3	MEAN	R1	R2	R3	MEAN	R1	R2	R3	MEAN	R1	R2	R3	MEAN	R1	R2	R3	MEAN
7	8.75	11.68	8.46	9.63	7.9	7.7	9.7	8.43333	8.6	9.8	9.6	9.33333	16.8	16.5	16.1	16.4667	9.4	7.7	9.9	9	14.67	13.69	16	14.7867
14	14.34	16.9	16.45	15.8967	14.23	16.4	13.43	12.43	16.5	16.6	12.25	15.1167	17.5	17.5	15.56	16.8533	11	8.3	10.4	9.9	15.36	14.56	16.3	15.4067
21	18.4	18.5	15.23	17.3767	17.5	15.68	17.5	16.8933	17.8	19.86	17.9	18.52	18.3	15.47	18.7	17.49	11.4	13.2	9.5	11.3667	16.3	16.4	17.3	16.6667
28	21.2	25.67	20.8	22.5567	18.7	18.5	18.5	18.5667	19.2	19.5	19.8	19.5	18.48	17.47	19.3	18.4167	11.6	12	12.4	12	18	17.6	17.5	17.7
Mean
	SOD	Units/min/mg protein
	Vivek Hybrid 9												Bio 9637
DAT		T0				T1				T2				T0				T1				T2
	R1	R2	R3	Mean	R1	R2	R3	MEAN	R1	R2	R3	MEAN	R1	R2	R3	MEAN	R1	R2	R3	MEAN	R1	R2	R3	MEAN
7	21	23	25	23	31	32	36	33	46	48	51	48.3333	14	12	12	12.6667	17	19	16	17.3333	24	26	24	24.6667
14	29	34	33	32	44	41	47	44	39	41	44	41.3333	21	21	20	20.6667	23	19	21	21	33	34	37	34.6667
21	28	27	27	27.3333	31	34	32	32.3333	36	38	37	37	19	21	21	20.3333	23	20	21	21.3333	25	25	25	25
28	33	34	31	32.6667	32	31	32	31.6667	36	34	38	36	25	23	23	23.6667	26	24	23	24.3333	27	24	29	26.6667
Mean
	CAT	(micromole h2o2/min/mg protein
	Vivek Hybrid 9												Bio 9637
DAT		T0				T1				T2				T0				T1				T2
	R1	R2	R3	Mean	R1	R2	R3	MEAN	R1	R2	R3	MEAN	R1	R2	R3	MEAN	R1	R2	R3	MEAN	R1	R2	R3	MEAN
7	5.6	5.9	6.2	5.9	9.42	9.99	9.52	9.64333	15.32	16	17.89	16.4033	2.34	2.22	2.21	2.25667	5.6	4.2	4.24	4.68	8.31	9.23	8.45	8.66333
14	8.8	8.6	9.2	8.86667	16.3	16.46	17.26	16.6733	19.42	18.56	20.25	19.41	7.34	8.11	7.56	7.67	9.23	9.56	9.32	9.37	14.5	16.67	15.55	15.5733
21	12.57	9.46	11.23	11.0867	24.45	25.45	23.68	24.5267	29.94	33.33	27.28	30.1833	9.45	11.12	10.25	10.2733	14.42	12.87	15.55	14.28	23.67	24.46	21.23	23.12
28	22.34	22.34	24.23	22.97	33.43	35.99	33.33	34.25	37.72	39.92	39.99	39.21	16.45	14.32	14.23	15	17.81	17.43	23.34	19.5267	24.43	28.43	29.98	27.6133
Mean
	Ascorbate peroxidase		micromole asc. Oxi./min/mg protein			.13-.55
	Vivek Hybrid 9												Bio 9637
DAT		T0				T1				T2				T0				T1				T2
	R1	R2	R3	Mean	R1	R2	R3	MEAN	R1	R2	R3	MEAN	R1	R2	R3	MEAN	R1	R2	R3	MEAN	R1	R2	R3	MEAN
7	0.32	0.21	0.21	0.246667	0.3	0.26	0.32	0.293333	0.34	0.36	0.32	0.34	0.13	0.15	0.12	0.133333	0.14	0.17	0.19	0.166667	0.29	0.25	0.22	0.253333
14	0.31	0.27	0.28	0.286667	0.46	0.48	0.42	0.453333	0.49	0.5	..49	0.495	0.19	0.21	0.23	0.21	0.26	0.29	0.26	0.27	0.43	0.38	0.39	0.4
21	0.43	0.39	0.41	0.41	0.58	0.53	0.56	0.556667	0.58	0.59	0.55	0.573333	0.32	0.29	0.35	0.32	0.35	0.38	0.37	0.366667	0.59	0.54	0.58	0.57
28	0.52	0.55	0.52	0.53	0.82	0.88	0.84	0.846667	0.85	0.83	0.87	0.85	0.46	0.42	0.45	0.443333	0.59	0.55	0.55	0.563333	0.75	0.76	0.77	0.76
Mean
	Membrane stability index			MSI(%)
	Vivek Hybrid 9												Bio 9637
DAT		T0				T1				T2				T0				T1				T2
	R1	R2	R3	Mean	R1	R2	R3	MEAN	R1	R2	R3	MEAN	R1	R2	R3	MEAN	R1	R2	R3	MEAN	R1	R2	R3	MEAN
7	81.46	79.34	85.45	82.0833	64	76.28	76	72.0933	81.3	81.38	81.36	81.3467	83.45	82.5	81.45	82.4667	66.38	66.35	65.36	66.03	77.78	77.62	78.54	77.98
14	80.29	88.12	82.47	83.6267	64.47	68.56	67.46	66.83	76.38	75	76	75.7933	79.36	80.365	77.34	79.0217	58.37	56.37	58.38	57.7067	61.34	63.47	66.47	63.76
21	77.46	77.23	72.2	75.63	63.34	63	60.3	62.2133	70	73.45	74	72.4833	78	76	77.35	77.1167	52.47	50.5	51	51.3233	65.56	65.56	66.64	65.92
28	74	79.35	63.87	72.4067	58.9	55.23	56	56.71	64.28	64	63.36	63.88	69.36	66	69.36	68.24	35.45	38.83	38.48	37.5867	58	58	56	57.3333
Mean
	Proline content			micromol/g.fwt
	Vivek Hybrid 9												Bio 9637
DAT		T0				T1				T2				T0				T1				T2
	R1	R2	R3	Mean	R1	R2	R3	MEAN	R1	R2	R3	MEAN	R1	R2	R3	MEAN	R1	R2	R3	MEAN	R1	R2	R3	MEAN
7	5.32	4.65	3.24	4.40333	6.43	6.83	5.7	6.43	6.87	7.35	7.26	7.16	3.21	4.27	4.35	3.94333	6.21	4.58	4.16	4.98333	9.37	7.46	7.34	8.05667
14	5.57	5.12	6.21	5.63333	11.32	14.73	11.48	12.51	11.83	11.87	12.48	12.06	4.6	3.45	4.76	4.27	5.21	5.58	5.11	5.3	10.45	11.26	10.46	10.7233
21	6.23	6.87	7.21	6.77	14.57	14.52	16.45	15.18	14.57	15.02	14.37	14.6533	5.78	5.54	6.21	5.84333	7.92	8.41	7.45	7.92667	16.32	13.58	13.47	14.4567
28	6.43	6.12	8.78	7.11	20.5	20.47	21.46	20.81	21.47	22.03	22.47	21.99	7.78	6.42	6.91	7.03667	7.89	7.97	8.22	8.02667	18.11	15.21	13.46	15.5933
Mean
	Glycine betaine content			microgram/gfwt
	Vivek Hybrid 9												Bio 9637
DAT		T0				T1				T2				T0				T1				T2
	R1	R2	R3	Mean	R1	R2	R3	MEAN	R1	R2	R3	MEAN	R1	R2	R3	MEAN	R1	R2	R3	MEAN	R1	R2	R3	MEAN
7	62	65	51	59.3333	111	128	157	132	180	190	199	189.667	32	45	63	46.6667	51	52	62	55	76	110	140	108.667
14	74	72	88	78	139	137	200	158.667	200	159	223	194	67	43	49	53	104	82	45	77	182	121	147	150
21	83	83	96	87.3333	140	177	190	169	190	174	149	171	64	72	53	63	88	78	115	93.6667	152	132	148	144
28	84	81	106	90.3333	241	253	210	234.667	271	248	255	258	74	52	75	67	127	129	121	125.667	199	224	165	196
Mean

## Sheet: Yield attributes
	Table4: Effect of pre-anthesis foliar application of 24-epibrassinolide on grain yield and its attributes in two maize hybrids under water deficit conditions
	Cob weight (g)
	Vivek Hybrid 9												Bio 9637
		T0				T1				T2				T0				T1				T2
	R1	R2	R3	Mean	R1	R2	R3	Mean	R1	R2	R3	Mean	R1	R2	R3	Mean	R1	R2	R3	Mean	R1	R2	R3	Mean
	109	102	107	106	78	83	80	80.3333	83	87	82	84	163	165	177	168.333	129	133	125	129	142	133	158	144.333
	Cob girth (cm)
	Vivek Hybrid 9												Bio 9637
		T0				T1				T2				T0				T1				T2
	R1	R2	R3	Mean	R1	R2	R3	Mean	R1	R2	R3	Mean	R1	R2	R3	Mean	R1	R2	R3	Mean	R1	R2	R3	Mean
	10.2	9.7	9.9	9.93333	8.6	8.5	8.2	8.43333	8.9	8.4	8.9	8.73333	10	10.5	10.2	10.2333	8.5	8.2	8	8.23333	9.3	9.2	9.5	9.33333
	100 grain weight (g)
	Vivek Hybrid 9												Bio 9637
		T0				T1				T2				T0				T1				T2
	R1	R2	R3	Mean	R1	R2	R3	Mean	R1	R2	R3	Mean	R1	R2	R3	Mean	R1	R2	R3	Mean	R1	R2	R3	Mean
	27	28	28	27.6667	22	20	23	21.6667	24	25	23	24	32	33	30	31.6667	21	18	19	19.3333	25	27	26	26
	Harvest index
	Vivek Hybrid 9												Bio 9637
		T0				T1				T2				T0				T1				T2
	R1	R2	R3	Mean	R1	R2	R3	Mean	R1	R2	R3	Mean	R1	R2	R3	Mean	R1	R2	R3	Mean	R1	R2	R3	Mean
	0.49	0.47	0.46	0.473333	0.34	0.37	0.35	0.353333	0.39	0.4	0.37	0.386667	0.47	0.49	0.43	0.463333	0.27	0.29	0.24	0.266667	0.34	0.33	0.37	0.346667
